# Supplementary material
Source: HighWire-hosted journal article supplement (https://www.cmajopen.ca/highwire/filestream/81084/field_highwire_adjunct_files/0/2017-0035-GRRAS-checklist.pdf)
Supplement: 2017-0035-GRRAS-checklist.pdf [file 2017-0035-GRRAS-checklist.pdf]

## GRRAS checklist for reporting of studies of reliability and agreement

Version based on Table I in: Kottner J, Audigé L, Brorson S, Donner A, Gajewski BJ, Hróbjartsson A, Robersts C, Shoukri M, Streiner DL. Guidelines for reporting reliability and agreement studies (GRRAS) were proposed. J Clin Epidemiol. 2011;64(1):96-106

| Section            | Item # | Checklist item                                                                                                                              | Reported on page # |
|--------------------|--------|---------------------------------------------------------------------------------------------------------------------------------------------|--------------------|
| Title/Abstract     | 1      | Identify in title or abstract that interrater/intrarater reliability or agreement was investigated.                                         | 1                  |
| Introduction       | 2      | Name and describe the diagnostic or measurement device of interest explicitly.                                                              | 4, 7               |
|                    | 3      | Specify the subject population of interest.                                                                                                 | 6-8                |
|                    | 4      | Specify the rater population of interest (if applicable).                                                                                   | NA                 |
|                    | 5      | Describe what is already known about reliability and agreement and provide a rationale for the study (if applicable).                       | 9                  |
| Methods            | 6      | Explain how the sample size was chosen. State the determined number of raters, subjects/objects, and replicate observations.                | 9-10               |
|                    | 7      | Describe the sampling method.                                                                                                               | 9                  |
|                    | 8      | Describe the measurement/rating process (e.g. time interval between repeated measurements, availability of clinical information, blinding). | 12                 |
|                    | 9      | State whether measurements/ratings were conducted independently.                                                                            | NA                 |
|                    | 10     | Describe the statistical analysis.                                                                                                          | 12                 |
|                    | 11     | State the actual number of raters and subjects/objects which were included and the number of replicate observations which were conducted.   | 12                 |
| Results            | 12     | Describe the sample characteristics of raters and subjects (e.g. training, experience).                                                     | 12                 |
|                    | 13     | Report estimates of reliability and agreement including measures of statistical uncertainty.                                                | 12-13              |
|                    | 14     | Discuss the practical relevance of results.                                                                                                 | 14, 15             |
| Discussion         | 15     | Provide detailed results if possible (e.g. online).                                                                                         | NA                 |
| Auxiliary material |        |                                                                                                                                             |                    |
